# Supplementary material for: Malagasy Polka Dot Moths (Noctuoidea: Erebidae: Arctiinae: Syntomini) of Ambohitantely—endemism in the most important relict of Central Plateau rainforest in Madagascar
Source: PeerJ. 2021 Jun 24;9:e11688. doi: 10.7717/peerj.11688 (PMC8240653; doi:10.7717/peerj.11688)
Supplement: Supplemental Information 2 — Specimens of the yellow morphotype of Thyrosticta dilata bold. [file peerj-09-11688-s002.xlsx]

## Sheet: Supplemental Table S1
No.	genus	species	specimen accession code
1.	Maculonaclia	ankasoka	DL_06-1080
2.	Maculonaclia	brevipenis	MAD_167
3.	Maculonaclia	brevipenis	MAD_168
4.	Maculonaclia	brevipenis	MAD_204
5.	Maculonaclia	brevipenis	MAD_205
6.	Maculonaclia	brevipenis	MAD_206
7.	Maculonaclia	brevipenis	MAD_207
8.	Maculonaclia	brevipenis	MAD_208
9.	Maculonaclia	tampoketsya	MAD_143
10.	Maculonaclia	tampoketsya	MAD_149
11.	Thyrosticta	dilata	MAD_135
12.	Thyrosticta	dilata	MAD_136
13.	Thyrosticta	dilata	MAD_137
14.	Thyrosticta	dilata	MAD_138
15.	Thyrosticta	dilata	MAD_139
16.	Thyrosticta	dilata	MAD_140
17.	Thyrosticta	dilata	MAD_141
18.	Thyrosticta	dilata	MAD_142
19.	Thyrosticta	dilata	MAD_144
20.	Thyrosticta	dilata	MAD_145
21.	Thyrosticta	dilata	MAD_146
22.	Thyrosticta	dilata	MAD_147
23.	Thyrosticta	dilata	MAD_148
24.	Thyrosticta	dilata	MAD_150
25.	Thyrosticta	dilata	MAD_151
26.	Thyrosticta	dilata	MAD_152
27.	Thyrosticta	dilata	MAD_153
28.	Thyrosticta	dilata	MAD_154
29.	Thyrosticta	dilata	MAD_155
30.	Thyrosticta	dilata	MAD_156
31.	Thyrosticta	dilata	MAD_157
32.	Thyrosticta	dilata	MAD_158
33.	Thyrosticta	dilata	MAD_159
34.	Thyrosticta	dilata	MAD_160
35.	Thyrosticta	dilata	MAD_161
36.	Thyrosticta	dilata	MAD_162
37.	Thyrosticta	dilata	MAD_163
38.	Thyrosticta	dilata	MAD_164
39.	Thyrosticta	dilata	MAD_165
40.	Thyrosticta	dilata	MAD_170
41.	Thyrosticta	dilata	MAD_171
42.	Thyrosticta	dilata	MAD_190
43.	Thyrosticta	dilata	MAD_191
44.	Thyrosticta	dilata	MAD_192
45.	Thyrosticta	dilata	MAD_193
46.	Thyrosticta	dilata	MAD_194
47.	Thyrosticta	dilata	MAD_195
48.	Thyrosticta	dilata	MAD_196
49.	Thyrosticta	dilata	MAD_197
50.	Thyrosticta	dilata	MAD_198
51.	Thyrosticta	dilata	MAD_199
52.	Thyrosticta	dilata	MAD_200
53.	Thyrosticta	dilata	MAD_201
54.	Thyrosticta	dilata	MAD_202
55.	Thyrosticta	dilata	MAD_203
56.	Thyrosticta	vestigii	MAD_169
57.	Tritonaclia	stephania	MAD_166
58.	Tsarafidynia	perpusilla	MAD_214
