# Supplementary material for: Malagasy Polka Dot Moths (Noctuoidea: Erebidae: Arctiinae: Syntomini) of Ambohitantely—endemism in the most important relict of Central Plateau rainforest in Madagascar
Source: PeerJ. 2021 Jun 24;9:e11688. doi: 10.7717/peerj.11688 (PMC8240653; doi:10.7717/peerj.11688)
Supplement: Supplemental Information 3 — Codes of the specimens of the yellow morphotype of T. dilata bold. GenBank accession code for the barcode sequence of Fletcherinia decaryi: MK158546. [file peerj-09-11688-s003.xlsx]

## Sheet: Supplemental Table S2
GenBank access code	MW817635	MW817636	MW817637	MW817639	MW817640	MW817641	MW817642	MW817644	MW817645	MW817646	MW817647	MW817648	MW817649	MW817650	MW817651	MW817652	MW817653	MW817654	MW817655	MW817656	MW817657	MW817658	MW817659	MW817660	MW817661	MW817662	MW817663	MW817664	MW817665	MW817638	MW817643
	MAD_137	MAD_141	MAD_142	MAD_144	MAD_145	MAD_146	MAD_147	MAD_151	MAD_152	MAD_153	MAD_154	MAD_155	MAD_156	MAD_157	MAD_158	MAD_159	MAD_160	MAD_162	MAD_164	MAD_165	MAD_171	MAD_191	MAD_193	MAD_194	MAD_195	MAD_198	MAD_199	MAD_200	MAD_202	MAD_143	MAD_149
MAD_137 T. dilata
MAD_141 T. dilata	0
MAD_142 T. dilata	0	0
MAD_144 T. dilata	0	0	0
MAD_145 T. dilata	0	0	0	0
MAD_146 T. dilata	0	0	0	0	0
MAD_147 T. dilata	0	0	0	0	0	0
MAD_151 T. dilata	0	0	0	0	0	0	0
MAD_152 T. dilata	0	0	0	0	0	0	0	0
MAD_153 T. dilata	0	0.00169779	0.00160514	0.0016129	0.00160514	0.00160514	0.00160772	0.00160772	0.00160514
MAD_154 T. dilata	0	0.00169779	0.00160514	0.0016129	0.00160514	0.00160514	0.00160772	0.00160772	0.00160514	0
MAD_155 T. dilata	0	0.00169779	0.00161551	0.00162338	0.00161551	0.00161551	0.00161812	0.00161812	0.00161551	0	0
MAD_156 T. dilata	0	0	0	0	0	0	0	0	0	0.00160772	0.00160772	0.00161812
MAD_157 T. dilata	0	0	0	0	0	0	0	0	0	0.0016129	0.0016129	0.00161551	0
MAD_158 T. dilata	0	0	0	0	0	0	0	0	0	0	0	0	0	0
MAD_159 T. dilata	0	0	0	0	0	0	0	0	0	0.00160514	0.00160514	0.00161551	0	0	0
MAD_160 T. dilata	0	0	0	0	0	0	0	0	0	0.00160514	0.00160514	0.00161551	0	0	0	0
MAD_162 T. dilata	0	0	0	0	0	0	0	0	0	0	0	0	0	0	0	0	0
MAD_164 T. dilata	0	0	0	0	0	0	0	0	0	0	0	0	0	0	0	0	0	0
MAD_165 T. dilata	0	0	0	0	0	0	0	0	0	0.00160514	0.00160514	0.00161551	0	0	0	0	0	0	0
MAD_171 T. dilata	0	0	0	0	0	0	0	0	0	0	0	0	0	0	0	0	0	0	0	0
MAD_191 T. dilata	0	0	0	0	0	0	0	0	0	0	0	0	0	0	0	0	0	0	0	0	0
MAD_193 T. dilata	0	0	0	0	0	0	0	0	0	0	0	0	0	0	0	0	0	0	0	0	0	0
MAD_194 T. dilata	0	0	0	0	0	0	0	0	0	0.00164204	0.00164204	0.00164474	0	0	0	0	0	0	0	0	0	0	0
MAD_195 T. dilata	0	0	0	0	0	0	0	0	0	0	0	0	0	0	0	0	0	0	0	0	0	0	0	0
MAD_198 T. dilata	0	0	0	0	0	0	0	0	0	0.00162866	0.00162866	0.00163132	0	0	0	0	0	0	0	0	0	0	0	0	0
MAD_199 T. dilata	0	0	0	0	0	0	0	0	0	0.00164204	0.00164204	0.00164474	0	0	0	0	0	0	0	0	0	0	0	0	0	0
MAD_200 T. dilata	0	0	0	0	0	0	0	0	0	0	0	0	0	0	0	0	0	0	0	0	0	0	0	0	0	0	0
MAD_202 T. dilata	0	0	0	0	0	0	0	0	0	0	0	0	0	0	0	0	0	0	0	0	0	0	0	0	0	0	0	0
MAD_143 M. tampoketsya	0.116719	0.12037	0.12037	0.120743	0.12037	0.12037	0.120743	0.120743	0.12037	0.12037	0.12037	0.12037	0.120743	0.12037	0.115625	0.12037	0.12037	0.115987	0.116352	0.12037	0.115625	0.118211	0.117089	0.118012	0.115265	0.11838	0.116352	0.117089	0.116352
MAD_149 M. tampoketsya	0.119792	0.112054	0.11236	0.112903	0.11236	0.11236	0.11254	0.11254	0.11236	0.110754	0.110754	0.109855	0.11254	0.11129	0.108772	0.11236	0.11236	0.111314	0.109091	0.11236	0.109515	0.111765	0.11236	0.110016	0.11087	0.110749	0.110016	0.11329	0.113689	0
